# Supplementary material for: Abnormal coherence and sleep composition in children with Angelman syndrome: a retrospective EEG study
Source: PubMed Central journal article supplement (PMC5924514; doi:10.1186/s13229-018-0214-8), 2018-04-27

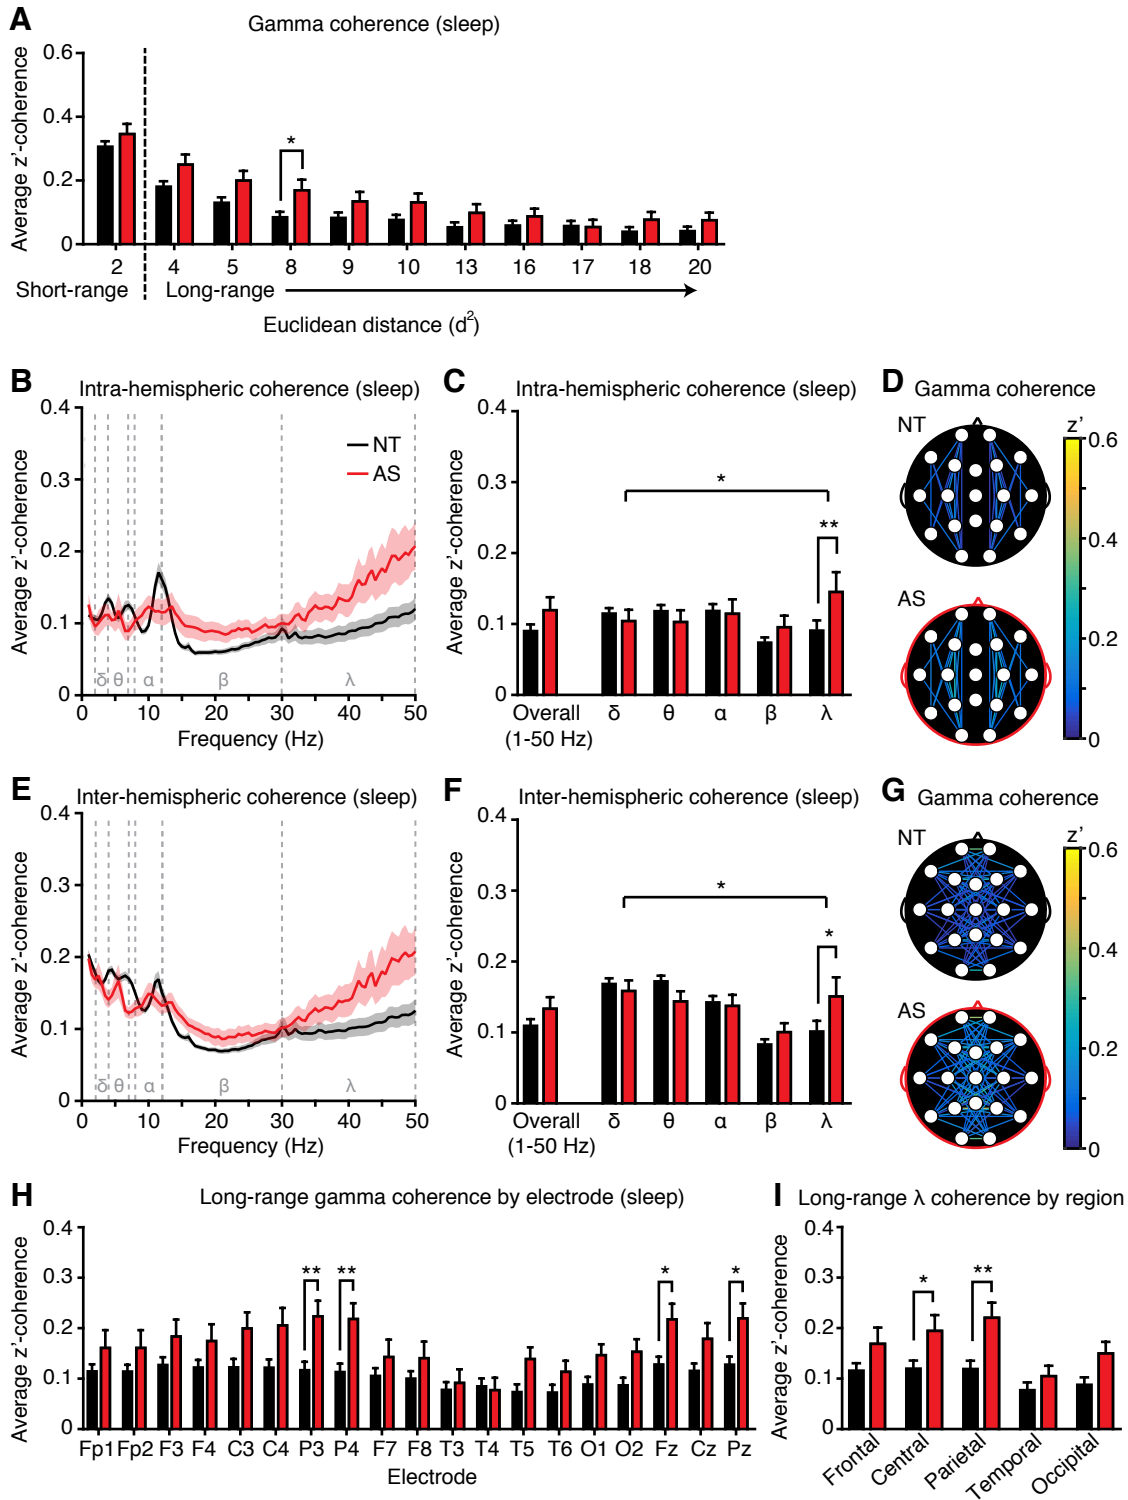

Supplement: 13229_2018_214_MOESM2_ESM.pdf [file 13229_2018_214_MOESM2_ESM.pdf]
