# Supplementary material for: Abnormal coherence and sleep composition in children with Angelman syndrome: a retrospective EEG study
Source: Springer Nature journal article supplement (doi:10.1186/s13229-018-0214-8), 2018-04-27

**A**

Cross-correlation (wake, 1-50 Hz): zero-lag removed

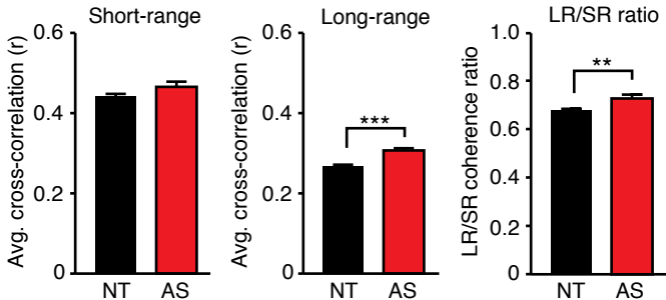**B**

Cross-correlation (sleep, 30-50 Hz): zero-lag removed

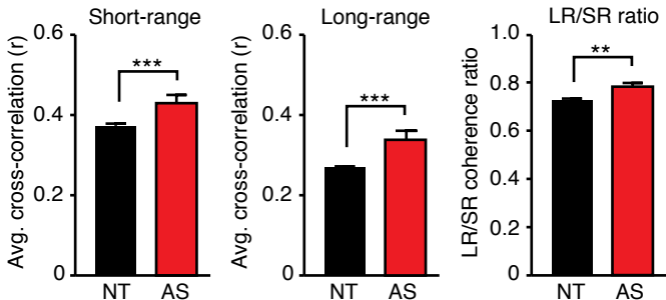

Supplement: MOESM3 [file 15725634]
